# Supplementary material for: Interferon-γ enhances the therapeutic effect of mesenchymal stem cells on experimental renal fibrosis
Source: PubMed Central journal article supplement (PMC7807061; doi:10.1038/s41598-020-79664-6), 2021-01-13

## **Supplementary material**

### **Interferon- $\gamma$ enhances the therapeutic effect of mesenchymal stem cells on experimental renal fibrosis**

Ryo Kanai<sup>1</sup>, Ayumu Nakashima<sup>1,2</sup>, Shigehiro Doi<sup>1</sup>, Tomoe Kimura<sup>1</sup>, Ken Yoshida<sup>1</sup>,  
Satoshi Maeda<sup>2,3</sup>, Naoki Ishiuchi<sup>1</sup>, Yumi Yamada<sup>1</sup>, Takeshi Ike<sup>1</sup>, Toshiki Doi<sup>1</sup>, Yukio  
Kato<sup>2,3</sup> & Takao Masaki<sup>1</sup>

<sup>1</sup>Department of Nephrology, Hiroshima University Hospital, 1-2-3 Kasumi, Minami-ku,  
Hiroshima, Hiroshima 734-8551, Japan

<sup>2</sup>Department of Stem Cell Biology and Medicine, Graduate School of Biomedical &  
Health Sciences, Hiroshima University, 1-2-3 Kasumi, Minami-ku, Hiroshima,  
Hiroshima 734-8553, Japan

<sup>3</sup>TWOCELLS Company, Limited, 16-35 Hijiyama-honmachi, Minami-ku, Hiroshima,  
732-0816, Japan

This file includes supplementary figure S1, S2, S3 and S4 and western blotting  
uncropped gel images.

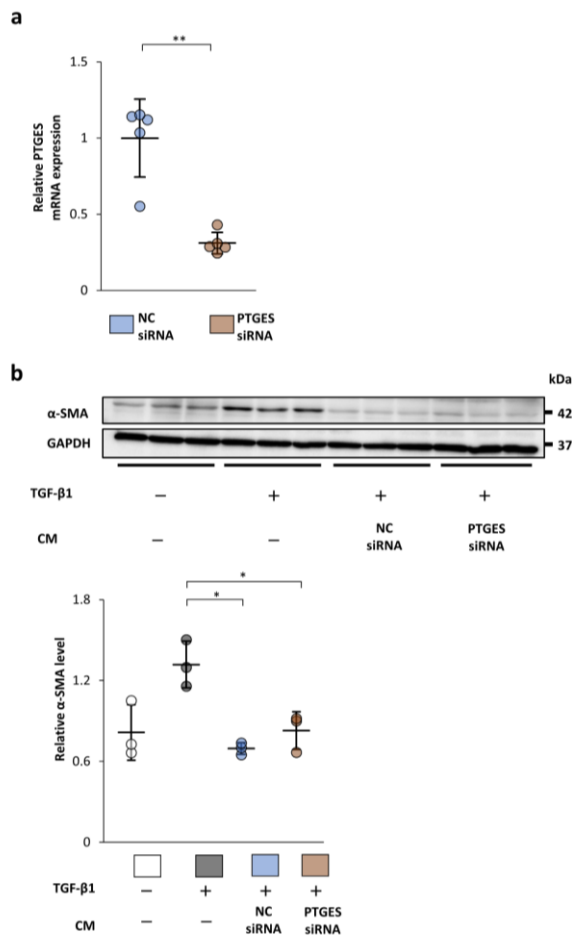

**Supplementary figure S1.** Effects of PTGES siRNA on the anti-fibrotic effects of IFN- $\gamma$ -treated hMSCs *in vitro*. **(a)** After hMSCs were transfected with NC siRNA or PTGES siRNA, the cells were treated with IFN- $\gamma$ , and then PTGES mRNA levels were evaluated by real-time PCR. PTGES mRNA levels were normalized to the level of 18S rRNA (n = 5 in each group). **(b)** After HK-2 cells were incubated with conditioned medium (CM) from IFN- $\gamma$ -treated hMSCs transfected with NC siRNA or PTGES siRNA for 24 hours, the cells were treated with TGF- $\beta$ 1. The figure and graph show western blot analysis of  $\alpha$ -SMA in HK-2 cells.  $\alpha$ -SMA protein levels were normalized to GAPDH levels (n = 3 in each group). Data are presented as the mean  $\pm$  SD. \* $p$  < 0.05, \*\* $p$  < 0.01.

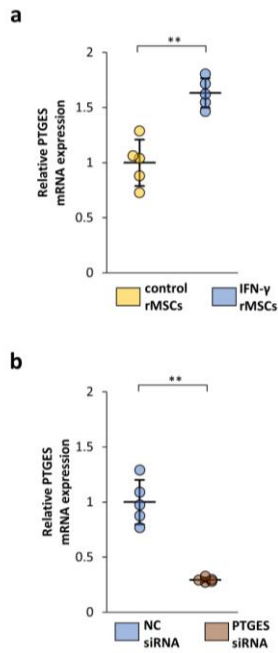

**Supplementary figure S2.** Expression of PTGES mRNA in rMSCs. **(a)** PTGES mRNA levels in rMSCs treated with or without IFN- $\gamma$  were evaluated by real-time PCR. PTGES mRNA levels were normalized to 18S rRNA levels (n = 5 in each group). **(b)** After rMSCs were transfected with NC or PTGES siRNAs, rMSCs were treated with IFN- $\gamma$ , and then PTGES mRNA levels were evaluated by real-time PCR. PTGES mRNA levels were normalized to the level of 18S rRNA (n = 5 in each group). Data are presented as the mean  $\pm$  SD. \*\* $p < 0.01$ .

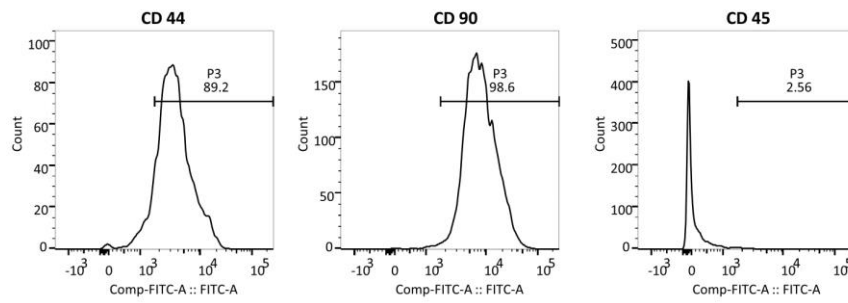

**Supplementary figure S3.** Cell surface markers on rMSCs. Flow cytometry showing the expression of surface markers on bone marrow-derived rMSCs.

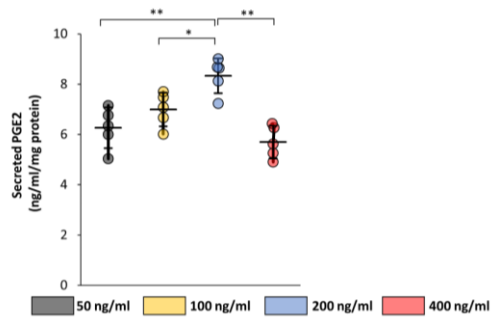

**Supplementary figure S4.** The amount of PGE2 from hMSCs over different concentrations of IFN- $\gamma$ . The amount of PGE2 in conditioned medium (CM) from hMSCs with 50, 100, 200, and 400 ng/ml IFN- $\gamma$  were analyzed by ELISA (n = 5 in each group). PGE2 secretion was significantly elevated in CM from 200 ng/ml IFN- $\gamma$ -treated human MSCs. Data are presented as the mean  $\pm$  SD. \*p < 0.05, \*\*p < 0.01.

## Western blotting uncropped gel images

Figure 1

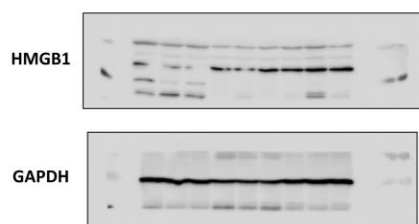

Figure 2

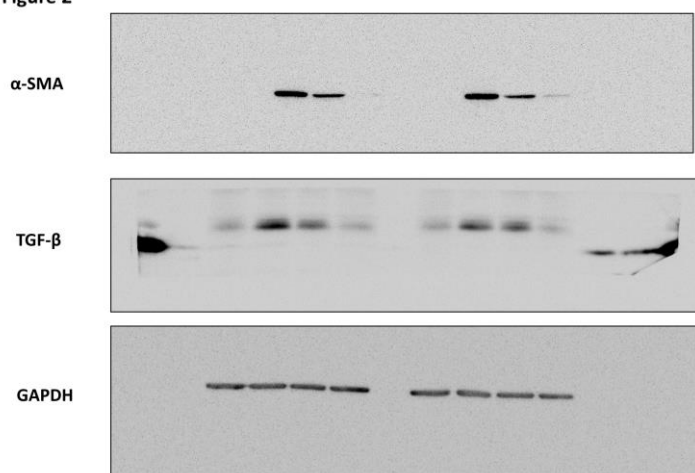

Figure 4

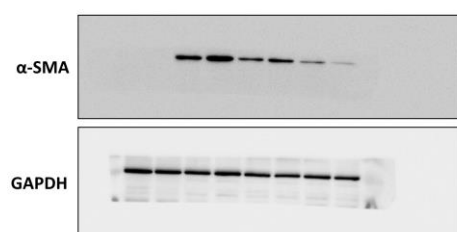

Figure 5

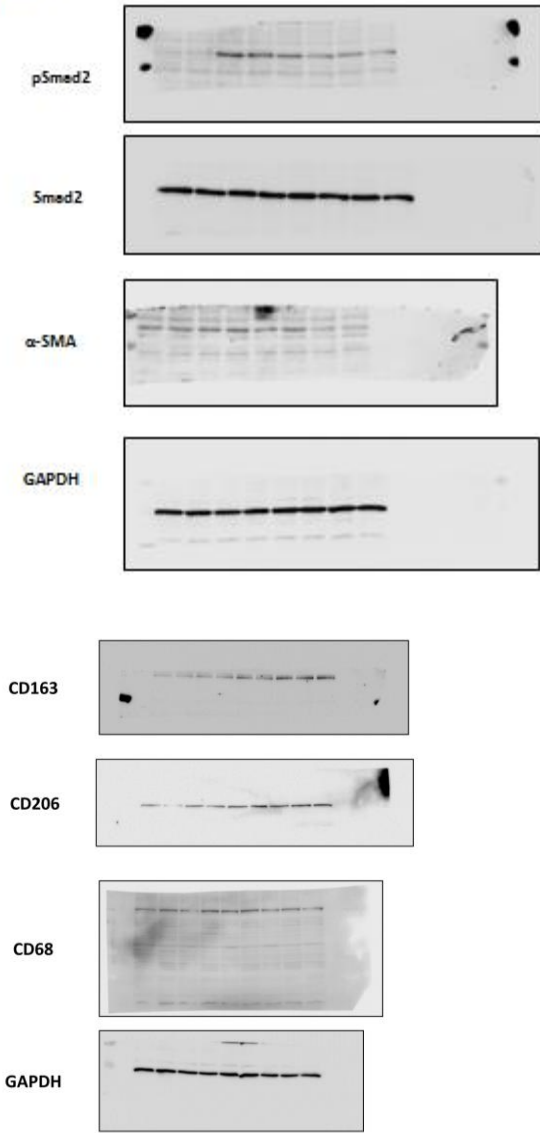

Figure 6

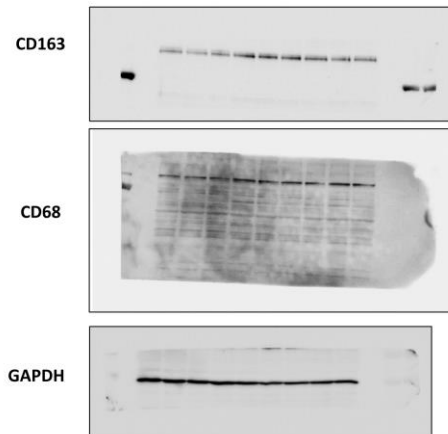

Figure 7

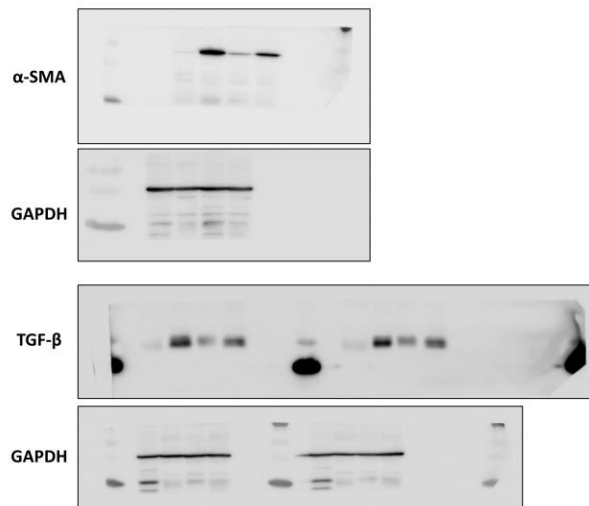

Supplementary Figure S1

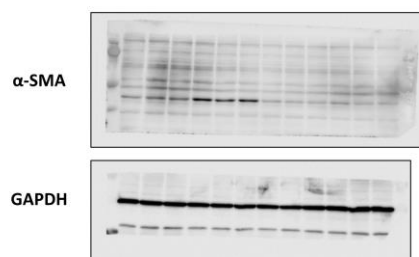

Supplement: 41598_2020_79664_MOESM1_ESM.pdf [file 41598_2020_79664_MOESM1_ESM.pdf]
